# Supplementary material for: Synthesis and characterization of bracelet-like magnetic nanorings consisting of Ag–Fe3O4 bi-component nanoparticles
Source: Royal Society of Chemistry journal article supplement (doi:10.1039/c1dt10733j), 2011-01-01
Supplement: c1dt10733j.pdf [file c1dt10733j.pdf]

## Supplementary Information

# Synthesis and characterization of bracelet-like magnetic nanorings consisting of $\text{Ag}/\text{Fe}_3\text{O}_4$ core/shell nanoparticles

By Shuai Zhou and Qianwang Chen

*Hefei National Laboratory for Physical Sciences at Microscale and Department of Materials Science & Engineering, University of Science and Technology of China, Hefei, 230026, China*

### Figure captions:

Figure S1. SEM image of the nanorings dried with an external magnet (0.15 T) under the copper slice.

Figure S2. TEM images of the single nanorings after intense sonication for 15 min.

Figure S3. TEM images of many nanorings after intense sonication for 15 min.

Figure S4. TEM of the silver synthesized by 0.29 g (1 mmol) tri-sodium citrate, 0.2 mL silver nitrate (0.1 M) solution and 0.1 mL hydrazine hydrate solution, reaction time 10 min, without heating and was collected by centrifuge.

Figure S5. HR-TEM image of interface between two nanoparticles.

Figure S6. TEM image of  $\text{Fe}_3\text{O}_4$  products synthesized without silver.

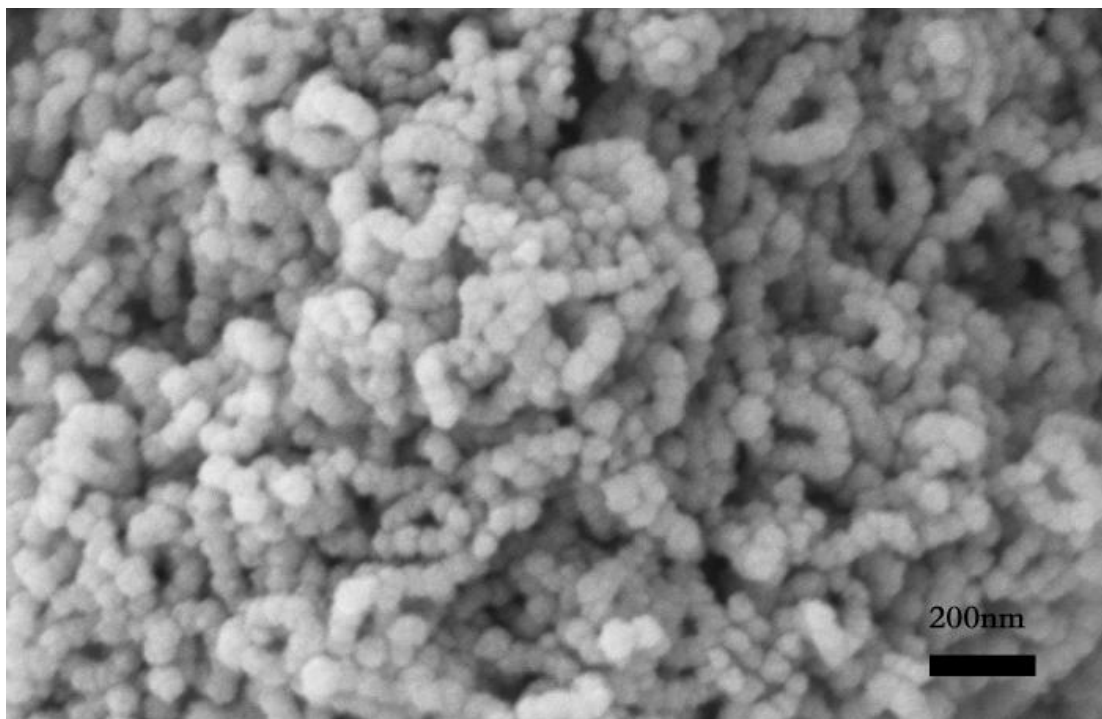

Figure S1

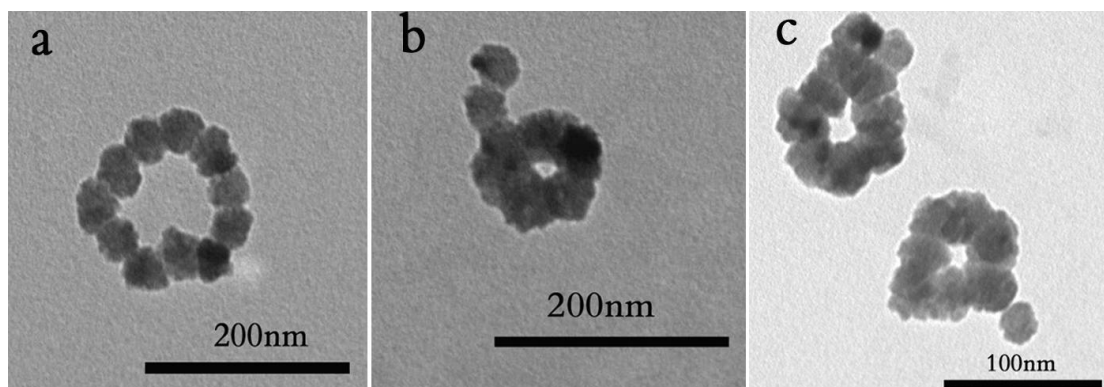

Figure S2

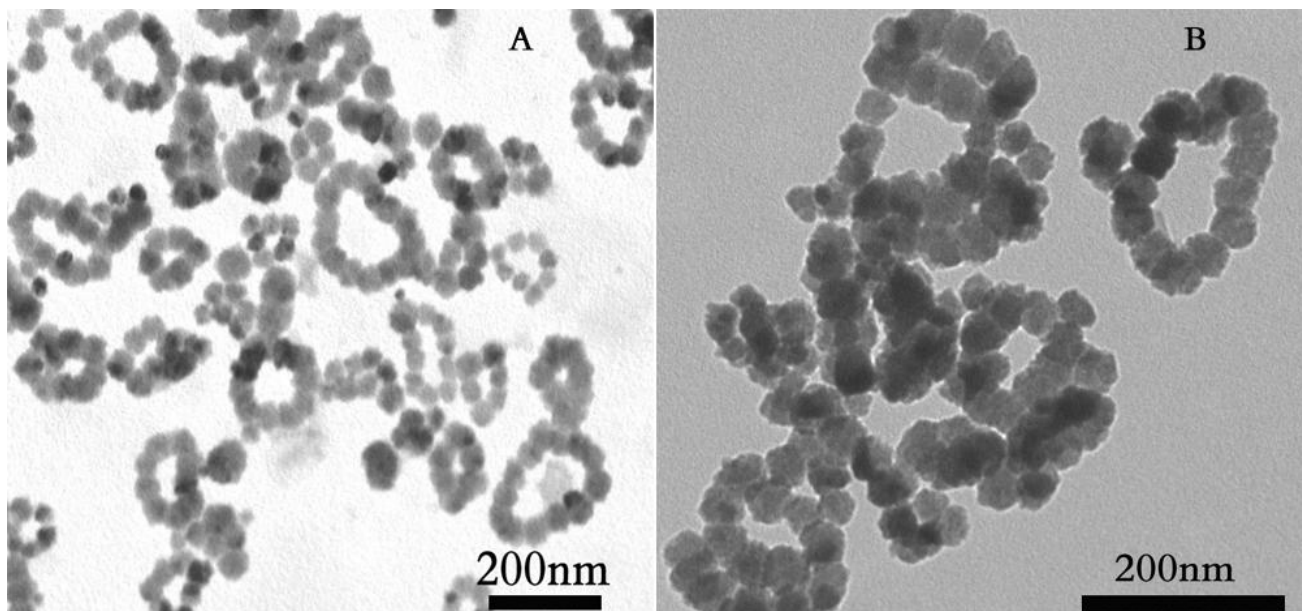

Figure S3

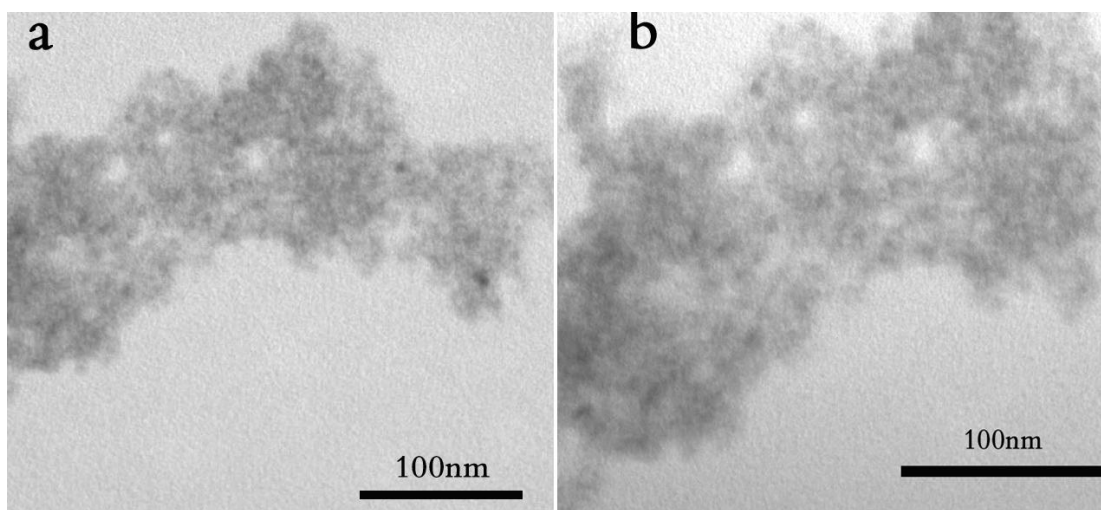

Figure S4

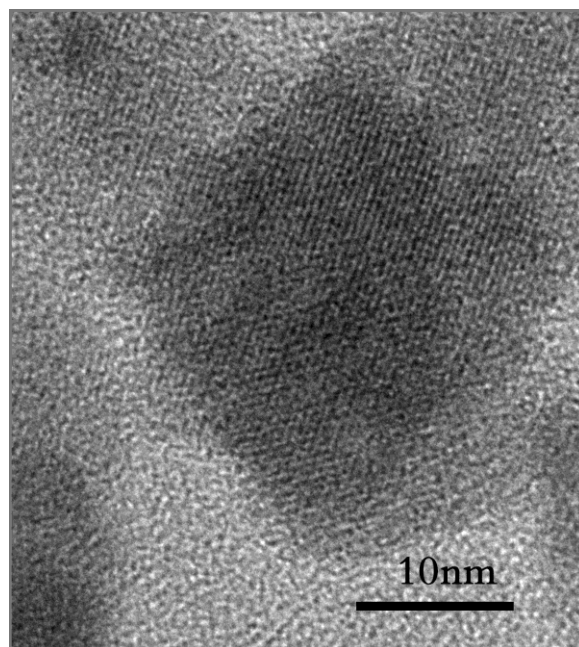

Figure S5

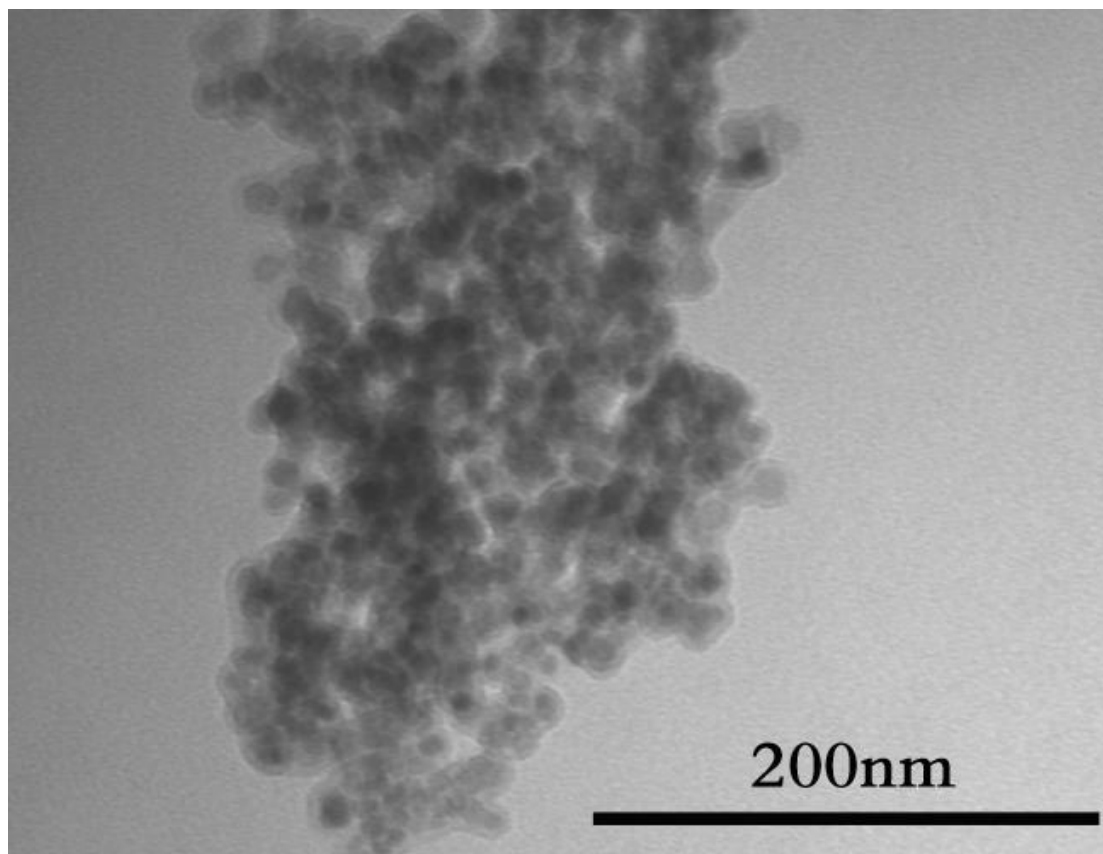

Figure S6
